# Supplementary material
Source: PubMed Central journal article supplement (PMC2751568)
Supplement: ajpath.2009.090133_2.pdf [file ajpath.2009.090133_2.pdf]

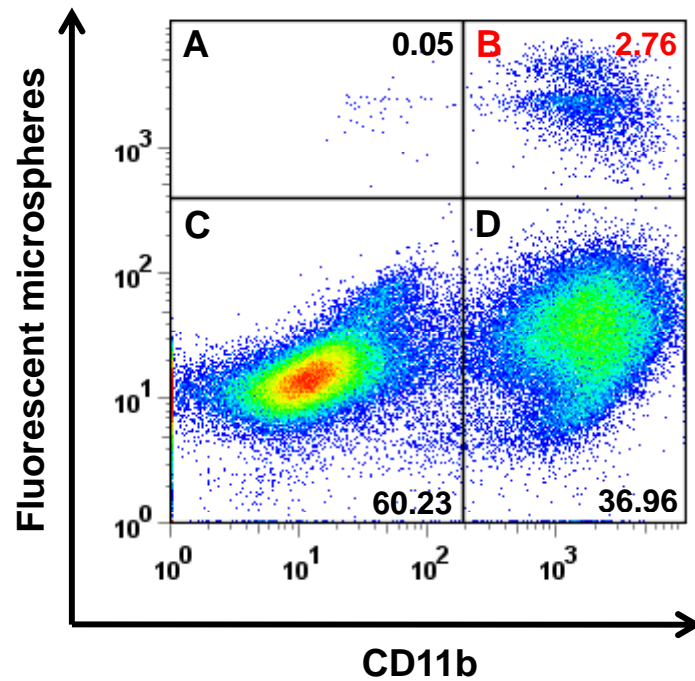

**A: Fluorescent microspheres containing CD11- cells**

**B: Fluorescent microspheres containing CD11+ cells**

**C: Cell debris**

**D: Free CD11+ cells**
