# Supplementary material
Source: PubMed Central journal article supplement (PMC2751568)

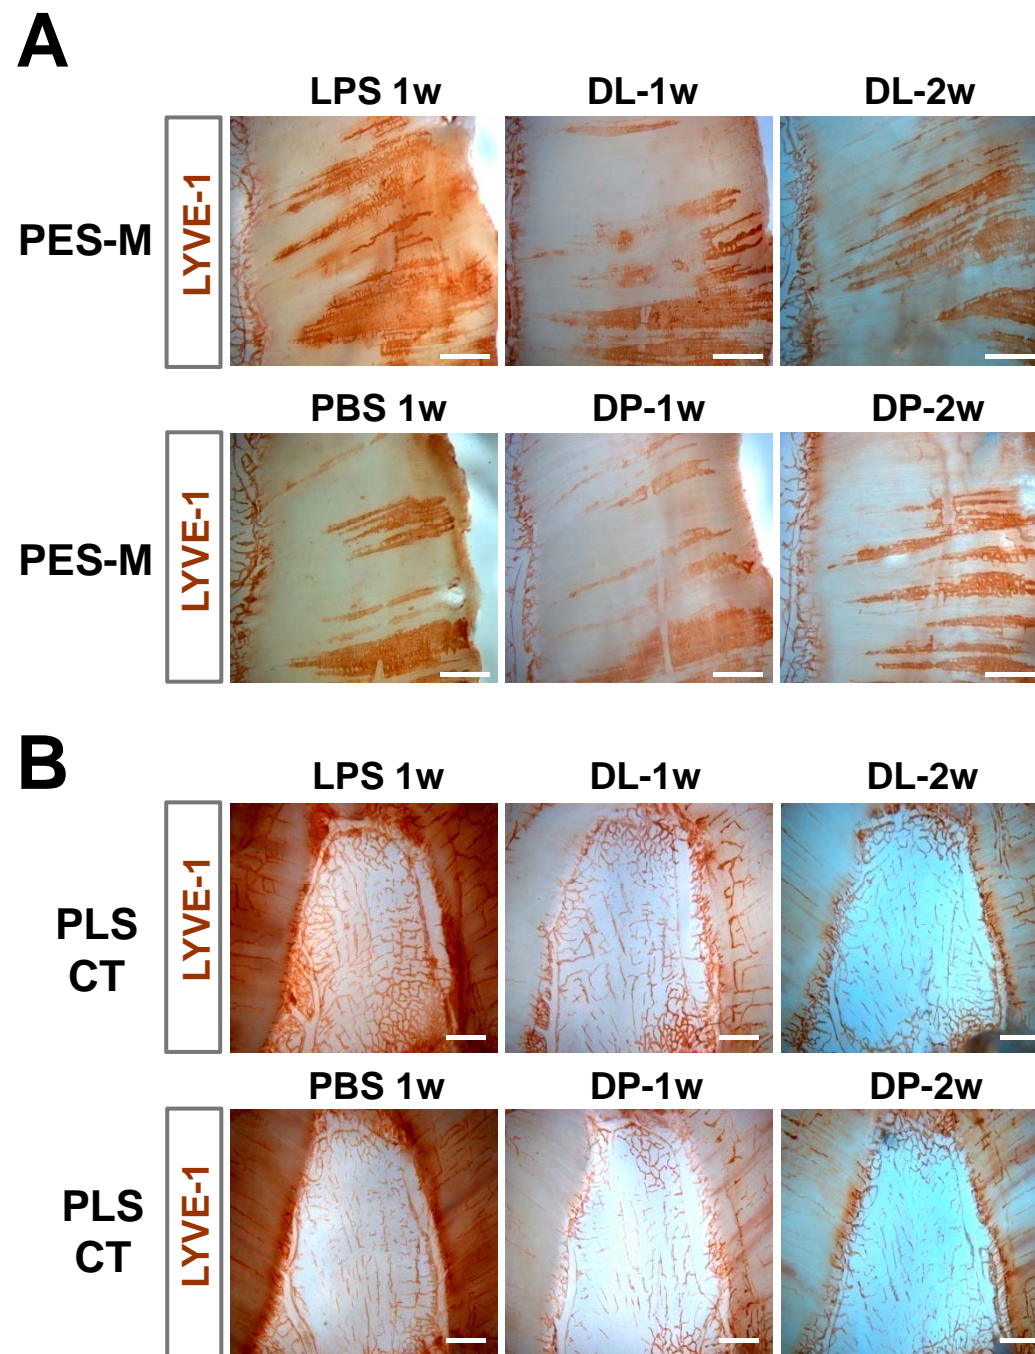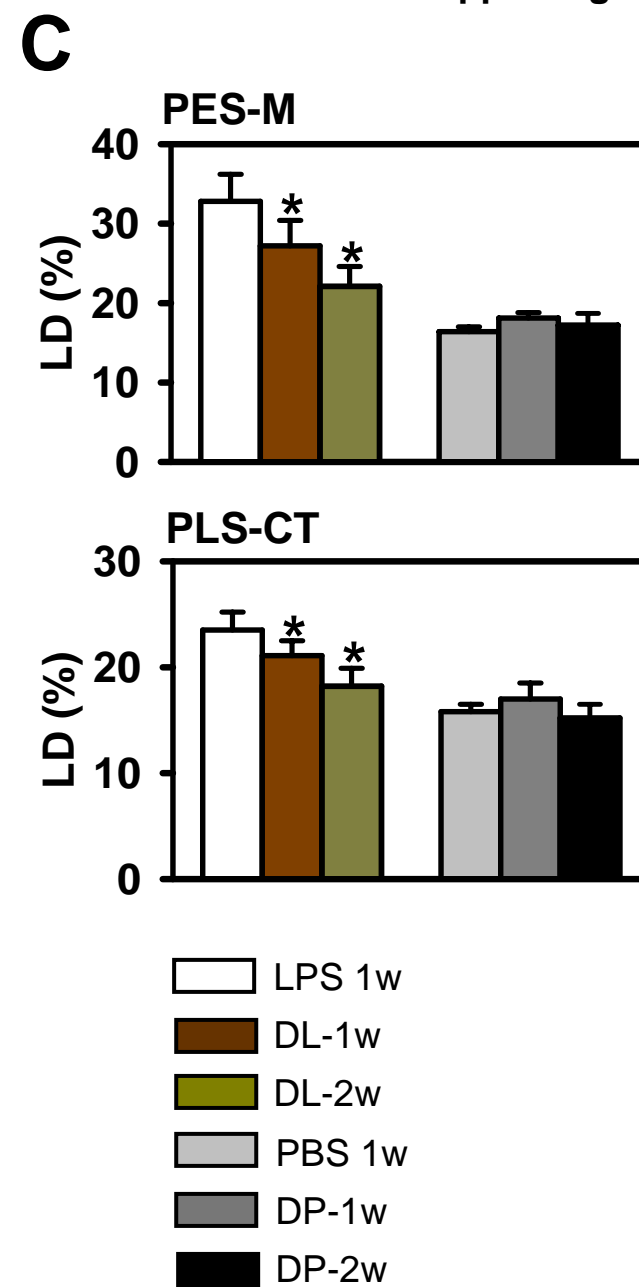

Supplement: ajpath.2009.090133_1.pdf [file ajpath.2009.090133_1.pdf]
